# Supplementary material for: Synthesis, biological evaluation and docking studies of some novel isatin-3-hydrazonothiazolines
Source: Royal Society of Chemistry journal article supplement (doi:10.1039/c6ra10043k), 2016-01-01

## Synthesis, biological evaluation and docking studies of some novel isatin-3-hydrazonothiazolines

Maqbool Ahmad<sup>a</sup>, Humayun Pervez<sup>a\*</sup>, Sumera Zaib<sup>b</sup>, Muhammad Yaqub<sup>a</sup>, Muhammad Moazzam Naseer<sup>c</sup>, Shafi Ullah Khan<sup>b</sup>, Jamshed Iqbal<sup>b\*</sup>

<sup>a</sup>*Institute of Chemical Sciences, Organic Chemistry Division, Bahauddin Zakariya University, Multan 60800, Pakistan*

<sup>b</sup>*Centre for Advanced Drug Research, COMSATS Institute of Information Technology, Abbottabad 22060, Pakistan*

<sup>c</sup>*Department of Chemistry, Quaid-i-Azam University, Islamabad 45320, Pakistan*

E-mail addresses: [pdhpervez@hotmail.com](mailto:pdhpervez@hotmail.com) (H. Pervez); [drjamshed@ciit.net.pk](mailto:drjamshed@ciit.net.pk) (J. Iqbal)

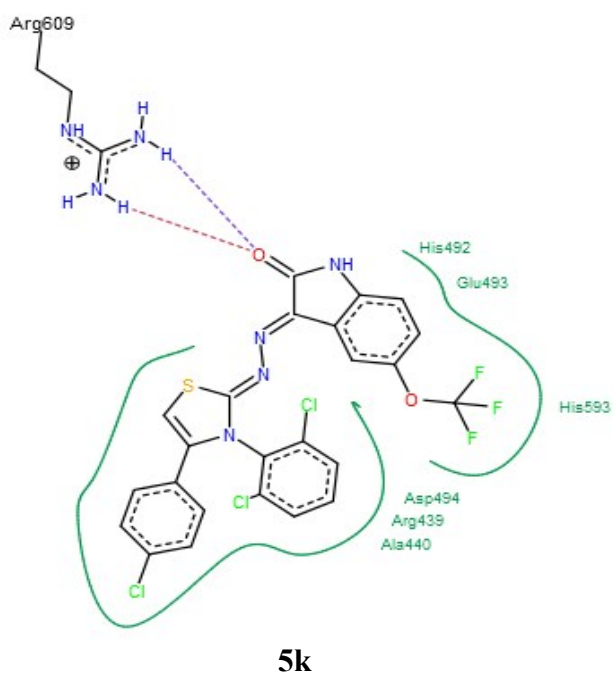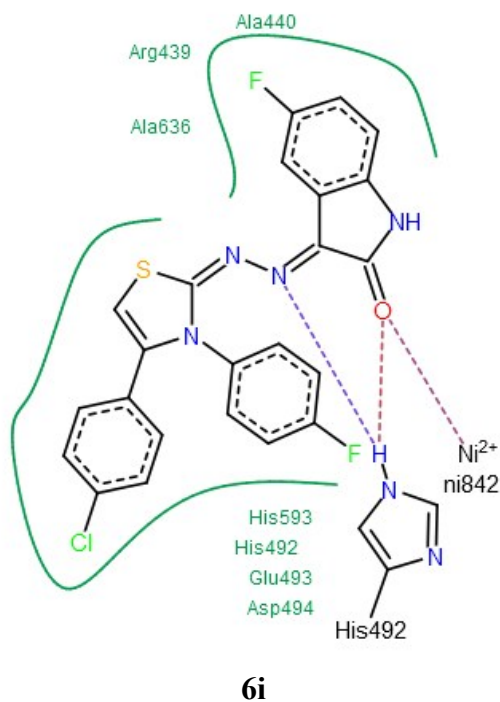

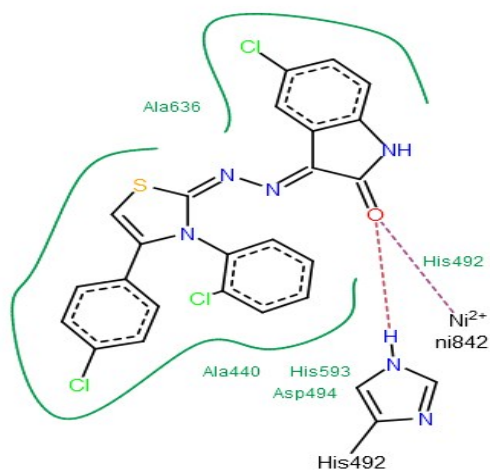

**7a**

**Figure S1.** 2D Interaction diagrams of the selected docked conformations for most potent inhibitors. Hydrogen bond interactions are indicated with dotted lines and hydrophobic interactions are shown with green lines. Metal interactions were observed by Nickel ions.

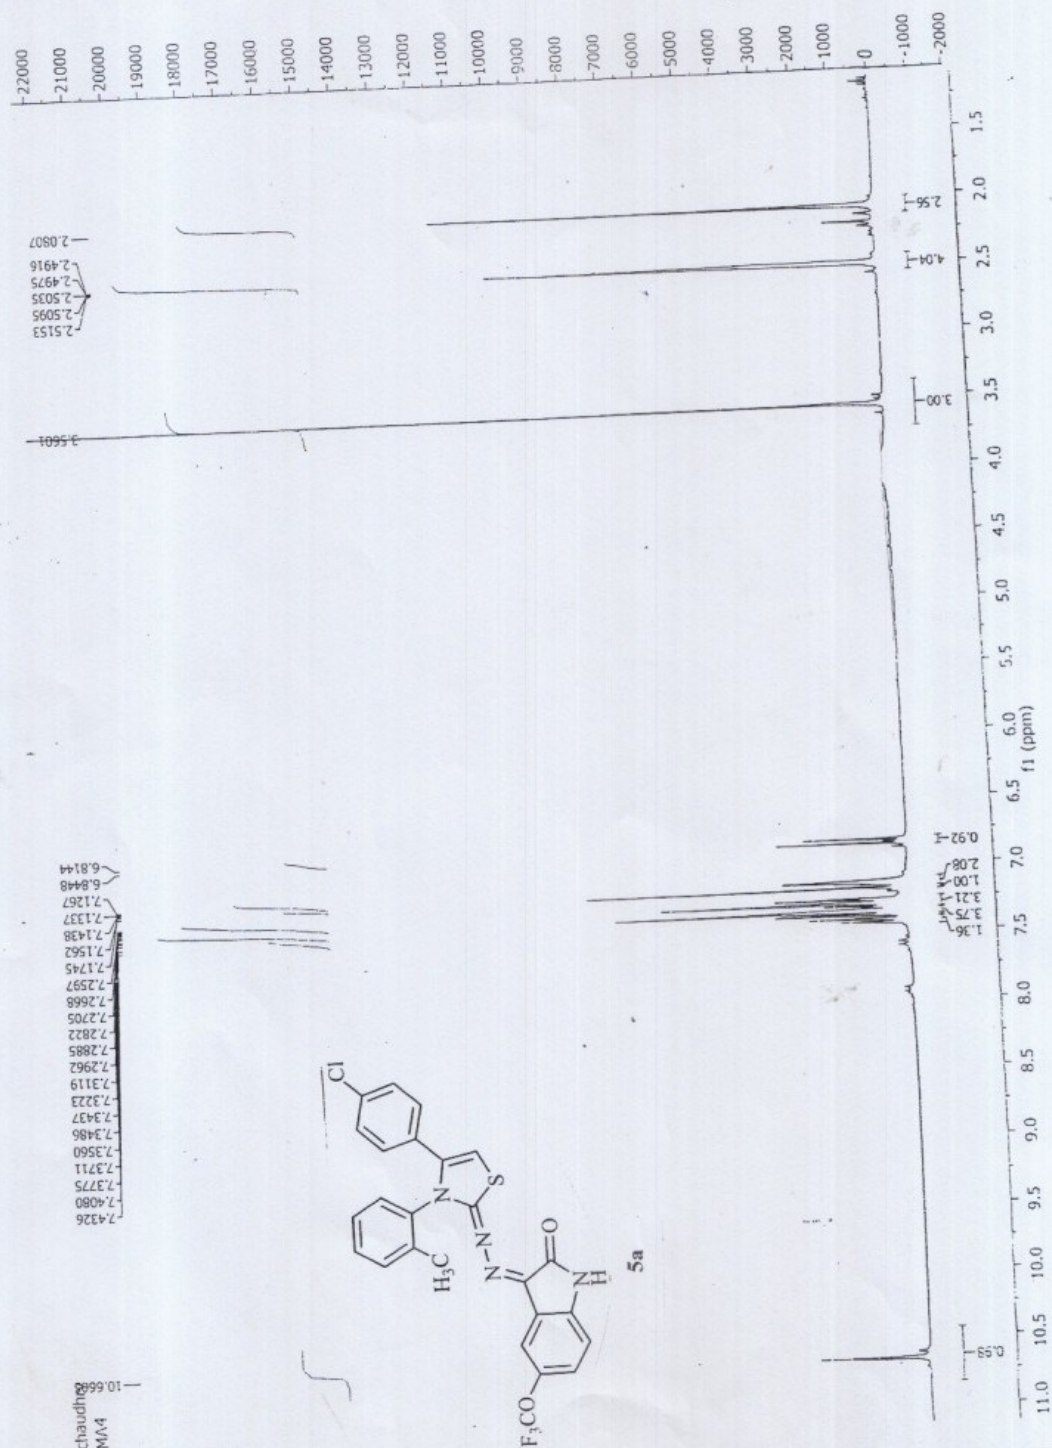

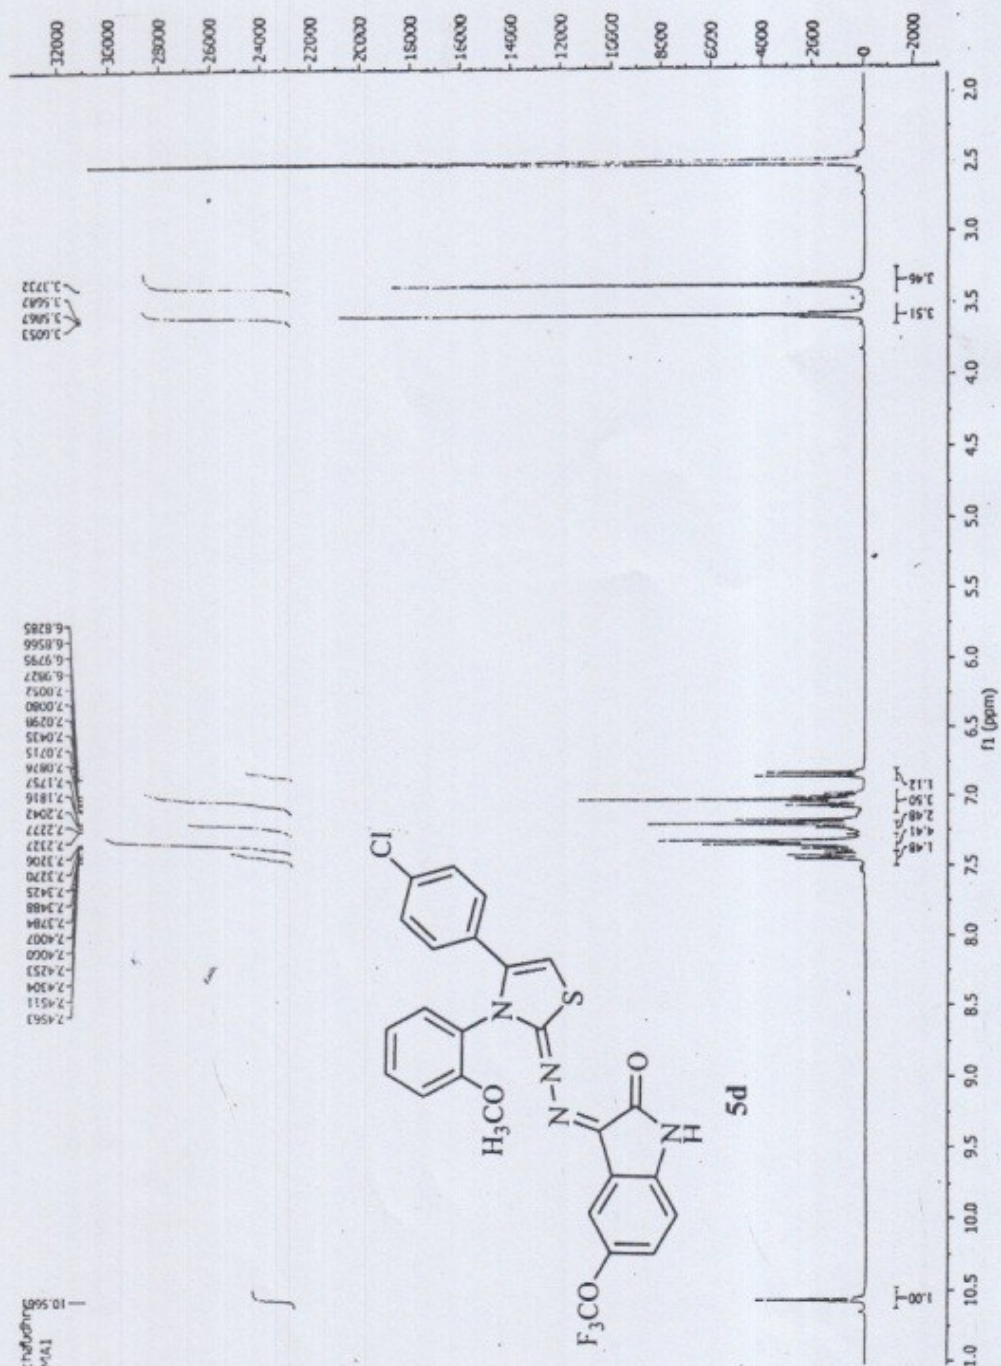



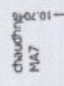

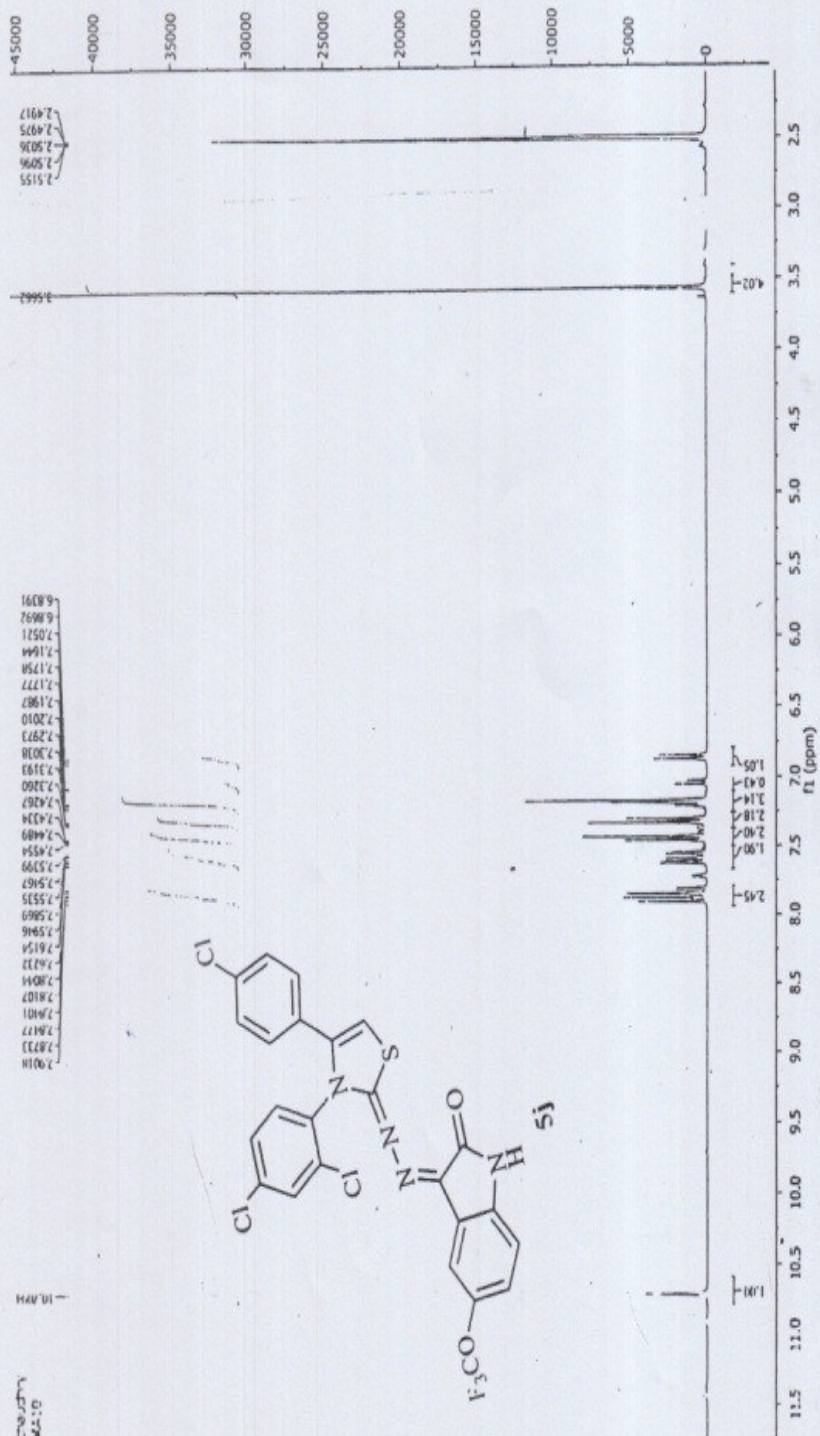



MAQBOOL /DR.HUMAYUN/ MA-15/DMSO  
1H

7.457  
7.432  
7.385  
7.356  
7.332  
7.298  
7.269  
7.153  
6.995  
6.986  
6.957  
6.925  
6.894  
6.886  
6.739  
6.724  
6.710  
6.696

3.306  
2.490  
2.078

AVANCE AV-300  
LAB NO: 108

NAME july-10-13  
EXPNO 3  
PROCNO 1  
Date\_ 20130710  
Time\_ 12.54  
INSTRUM spect  
PROBHD 5 mm DUL 13C-1  
PULPROG zg30  
TD 32768  
SOLVENT DMSO  
NS 35  
DS 0  
SWH 5995.204 Hz  
FIDRES 0.182959 Hz  
AQ 2.7329011 sec  
RG 512  
DM 83.400 usec  
DE 6.50 usec  
TE 298.0 K  
D1 1.50000000 sec  
TD0 1

===== CHANNEL f1 =====  
NUC1 1H  
P1 12.30 usec  
PL1 4.00 dB  
SFO1 300.1321009 MHz  
SI 32768  
SF 300.1300045 MHz  
WDW EM  
SSB 0  
LB 0.30 Hz  
GB 0  
PC 1.00

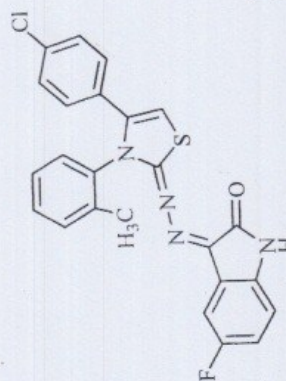

6a

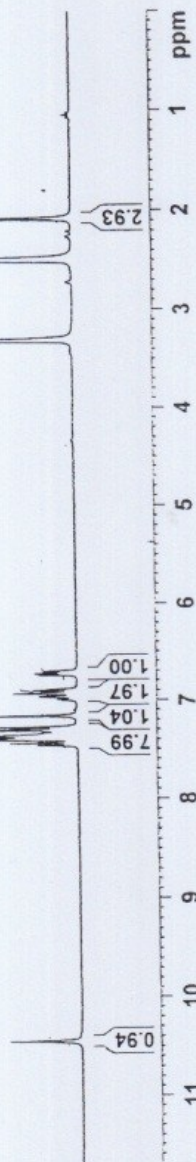

MAQBOOL/DR.HUMAYUN/ MA-18/DMSO  
1H

10.443  
10.351  
7.523  
7.497  
7.464  
7.432  
7.404  
7.378  
7.350  
7.338  
7.309  
7.274  
7.245  
7.189  
7.168  
7.162  
7.146  
7.072  
7.055  
7.043  
7.033  
7.013  
6.998  
6.967  
6.945  
6.755  
6.742  
6.728  
6.714  
3.612  
3.578  
3.305  
2.490

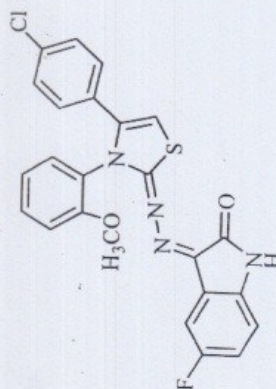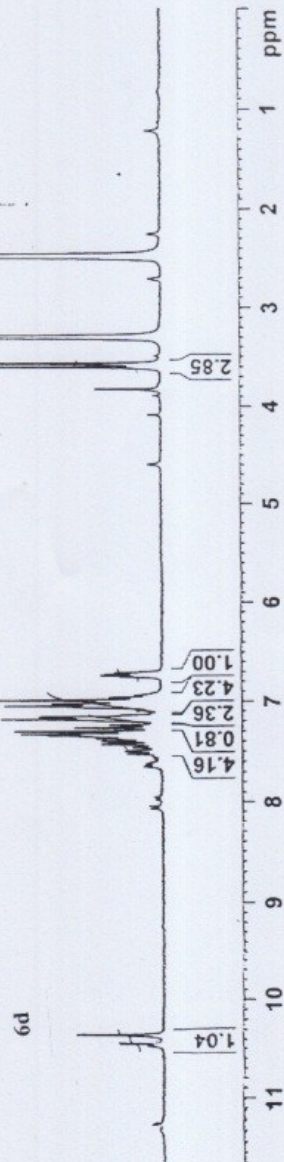

AVANCE AV-300  
LAB NO: 108

NAME July-10-13  
EXPNO 4  
PROCNO 1  
Date 20130710  
Time 12.58  
INSTRUM spect  
PROBHD 5 mm DUL 13C-1  
PULPROG zg30  
TD 32768  
SOLVENT DMSO  
NS 41  
DS 0  
SWH 5995.204 Hz  
FIDRES 0.182959 Hz  
AQ 2.7329011 sec  
RG 645.1  
DW 83.400 usec  
DE 6.50 usec  
TE 298.0 K  
D1 1.5000000 sec  
TD0 1  
===== CHANNEL f1 =====  
NUC1 1H  
P1 12.30 usec  
PL1 4.00 dB  
SFO1 300.1321009 MHz  
SI 32768  
SF 300.1300045 MHz  
WDW EM  
SSB 0  
LB 0.30 Hz  
GB 0  
PC 1.00



MAQBOOL/DR.HUMAYUN/MA-211/0000

<sup>1</sup>H

7.472  
7.439  
7.393  
7.364  
7.255  
7.226  
7.090  
7.061  
6.780  
6.766  
6.752  
6.737

10.408

AVANCE AV-300  
LAB NO: 108

NAME  
EXPNO 1  
PROCNO 1  
Date\_ 20130710  
Time 12.44  
INSTRUM spect  
PROBHD 5 mm DUL 13C-1  
PULPROG zg30  
TD 32768  
SOLVENT DMSO  
NS 32  
DS 0  
SWH 5995.204 Hz  
FIDRES 0.182959 Hz  
AQ 2.7329011 sec  
RG 512  
DM 83.400 usec  
DE 6.50 usec  
TE 298.0 K  
D1 1.50000000 sec  
TD0 1

===== CHANNEL f1 =====  
NUC1 <sup>1</sup>H  
P1 12.30 usec  
PL1 4.00 dB  
SFO1 300.1321009 MHz  
SI 32768  
SF 300.1300045 MHz  
WDW EM  
SSB 0  
LB 0.30 Hz  
GB 0  
PC 1.00

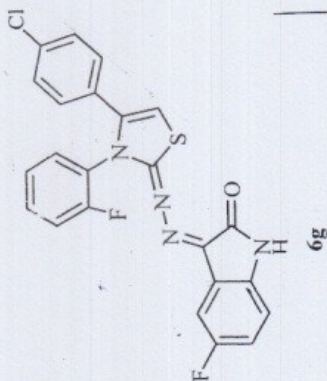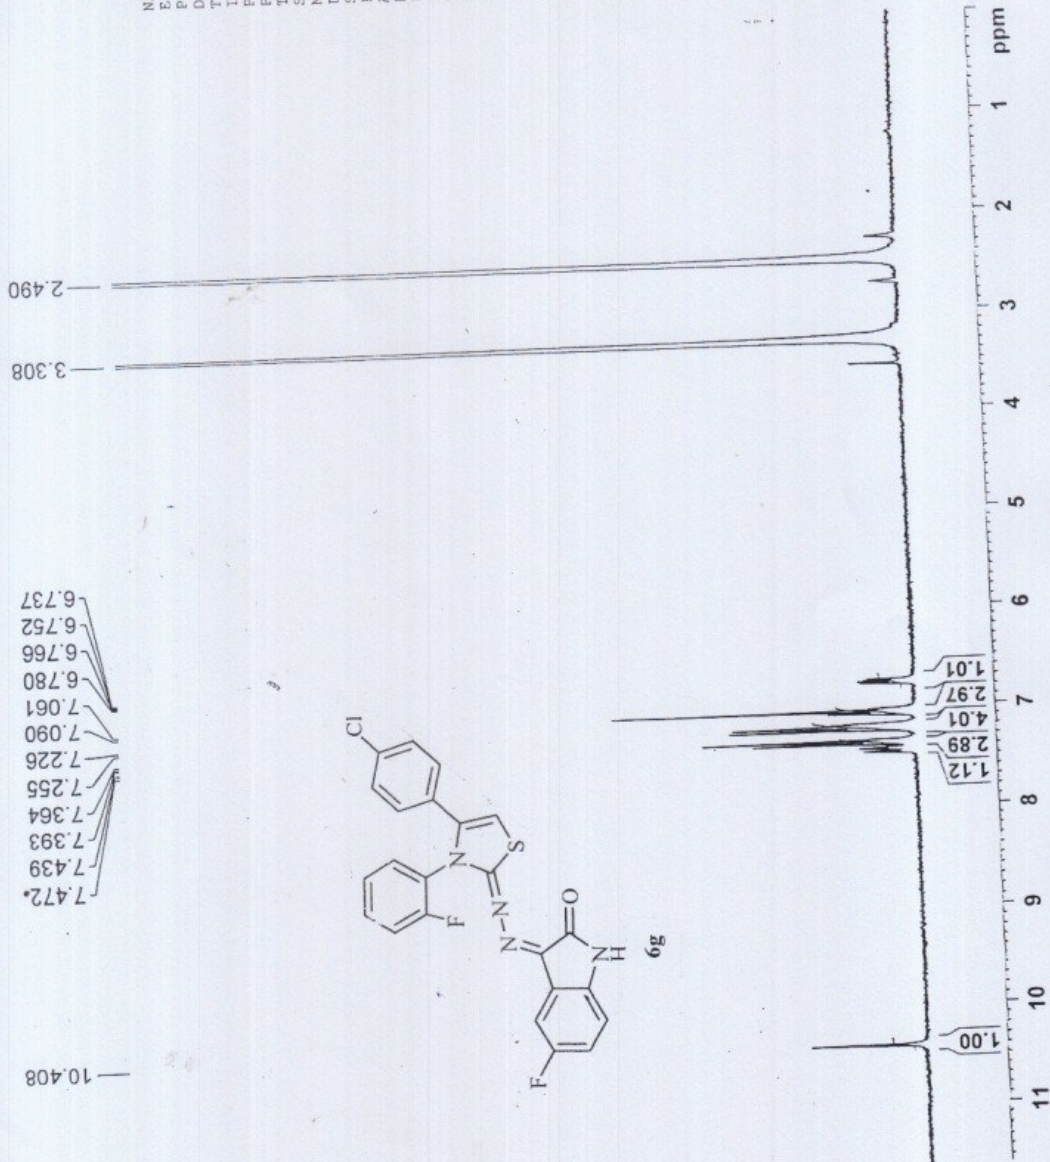

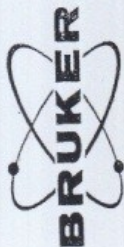

MA-26\_1HNMR\_DMSO

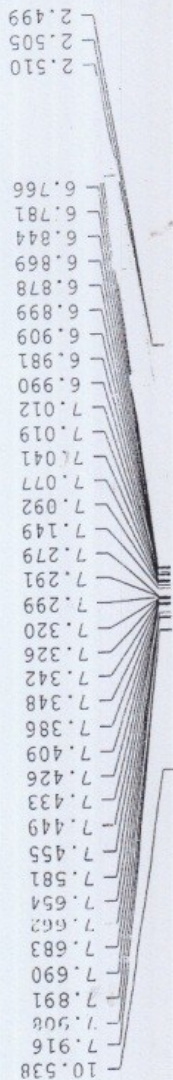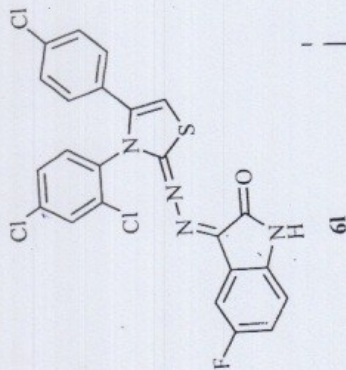

Current Data Parameters  
NAME MA-26\_1HNMR\_DMSO  
EXPNO 1  
PROCNO 1

F2 - Acquisition Parameters  
Date\_ 20130426  
Time 17.26  
INSTRUM spect  
PROBHD 5 mm BBO BB-1H  
PULPROG zg30  
TD 65536  
SOLVENT DMSO  
NS 4  
DS 0  
SWH 6172.839 Hz  
FIDRES 0.094190 Hz  
AQ 5.3084660 sec  
RG 362  
DM 81.000 usec  
DE 6.00 usec  
TE 673.2 K  
D1 1.0000000 sec  
TD0 1

===== CHANNEL f1 =====  
NUC1 1H  
P1 9.00 usec  
PL1 2.00 dB  
SFO1 300.1318534 MHz

F2 - Processing parameters  
SI 32768  
SF 300.1300000 MHz  
WDW EM  
SSB 0  
LB 0.30 Hz  
GB 0  
PC 1.00



MAQBOOL /DR.HUMAYUN/ MA-30/DMSO  
1H

10.541  
10.462  
7.500  
7.474  
7.435  
7.405  
7.382  
7.353  
7.340  
7.311  
7.277  
7.249  
7.228  
7.221  
7.193  
7.165  
7.067  
7.032  
7.011  
6.992  
6.965  
6.936  
6.778  
6.764  
6.750  
6.737  
3.823  
3.632  
3.580  
3.298  
2.490  
2.337  
2.301

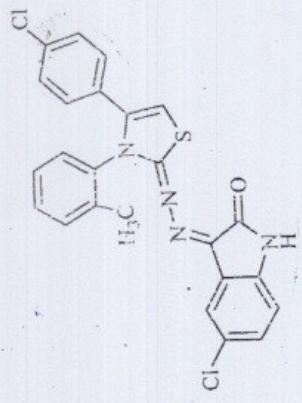

7a

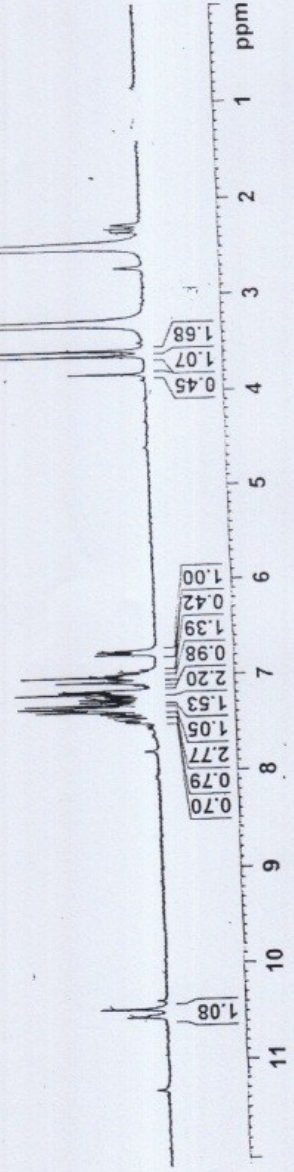

AVANCE AV-300  
LAB NO: 108

NAME july-15-13  
EXPNO 3  
PROCNO 1  
Date\_ 20130715  
Time\_ 12.27  
INSTRUM spect  
PROBHD 5 mm DUL 13C-1  
PULPROG zgpg30  
TD 32768  
SOLVENT DMSO  
NS 0  
DS 0  
SWH 5995.204 Hz  
FIDRES 0.182959 Hz  
AQ 2.7329011 sec  
RG 812.7  
DW 93.400 usec  
DE 6.50 usec  
TE 299.8 K  
D1 1.5000000 sec  
TD0 1  
===== CHANNEL f1 =====  
NUC1 1H  
P1 12.30 usec  
PL1 4.00 dB  
SFO1 300.1321009 MHz  
SI 32768  
SF 300.1300043 MHz  
EM 0  
WDW 0  
SSB 0  
LB 0  
GB 0  
PC 1.00



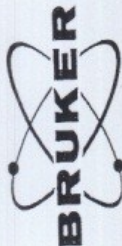

DR. HJAYUN PEEVEZ/MAQBOOL AHMAD/MA-33\_1HNMR\_DMSO

2.504  
3.604  
3.627  
3.627  
6.760  
6.775  
6.788  
6.814  
6.842  
7.003  
7.029  
7.054  
7.073  
7.090  
7.118  
7.160  
7.185  
7.210  
7.247  
7.274  
7.308  
7.327  
7.355  
7.392  
7.422  
7.444  
7.471  
7.498  
10.594  
10.729

Current Data Parameters  
NAME MA-33\_1HNMR\_1  
EXPNO 1  
PROCNO 1

F2 - Acquisition Parameters  
Date\_ 20130506  
Time 17.58

INSTRUM spect  
PROBHD 5 mm BBO BB-1H  
PULPROG zg30  
TD 65536  
SOLVENT CDCl3  
NS 8  
DS 0  
SWH 6172.839 Hz  
FIDRES 0.094190 Hz  
AQ 5.3084660 sec  
RG 161.3  
DW 81.000 usec  
DE 6.000 usec  
TE 673.2 K  
D1 1.00000000 sec  
TD0 1

===== CHANNEL f1 =====  
NUC1 1H  
P1 9.00 usec  
PL1 2.00 dB  
SFO1 300.1318534 MHz

F2 - Processing parameters  
SI 32768  
SF 300.1300000 MHz  
WDW EM  
SSB 0  
LB 0.30 Hz  
GB 0  
PC 1.00

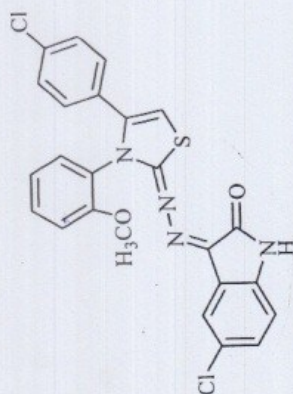

7d

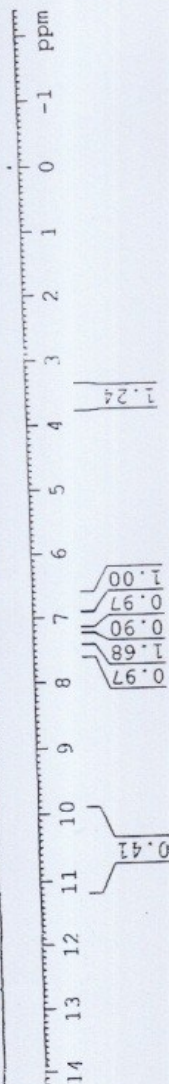

MAQBOOL /DR.HUMAYUN/ MA-36/DMSO  
1H

10.507  
10.488  
7.606  
7.671  
7.648  
7.605  
7.582  
7.558  
7.539  
7.455  
7.421  
7.392  
7.362  
7.354  
7.340  
7.315  
7.305  
7.297  
7.287  
7.264  
7.242  
7.212  
7.204  
7.183  
7.176  
7.138  
7.079  
6.778  
6.759  
6.750  
3.292  
2.490

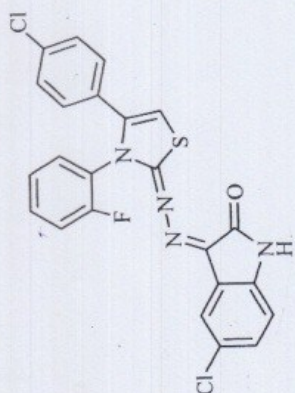

7g

AVANCE AV-300  
LAB NO. 108

NAME  
EXPNO 4  
PROCNO 1  
Date 20130712  
Time 12.15  
INSTRUM spect  
PROBHD 5 mm DUL 13C-1  
PULPROG zgpg30  
TD 32768  
SOLVENT DMSO  
NS 70  
DS 0  
SWH 5995.204 Hz  
FIDRES 0.182959 Hz  
AQ 2.7329011 sec  
RG 812.7  
DW 83.400 usec  
DE 6.50 usec  
TE 301.5 K  
D1 1.5000000 sec  
TDO 1  
===== CHANNEL f1 =====  
NUC1 1H  
P1 12.30 usec  
PL1 4.00 dB  
SFO1 300.1321009 MHz  
SI 32768  
SF 300.1300043 MHz  
WDW EM  
SSB 0  
LB 0.30 Hz  
GB 0  
PC 1.00

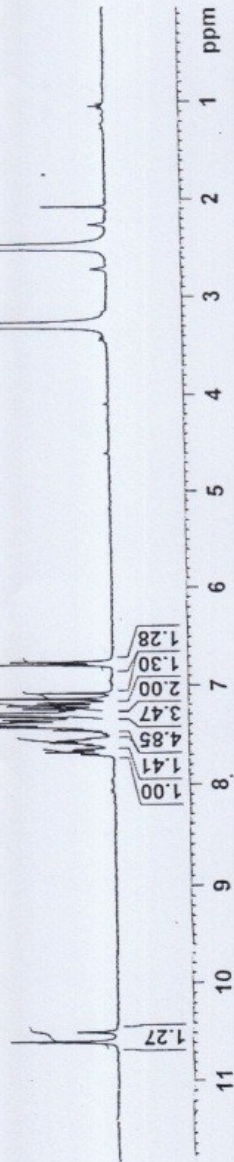



MAQBOOL /DR.HUMA YUN/ MA-39/DMSO  
1H

10.600  
10.500  
7.725  
7.704  
7.696  
7.676  
7.667  
7.646  
7.619  
7.451  
7.422  
7.415  
7.407  
7.399  
7.387  
7.332  
7.304  
7.284  
7.276  
7.257  
7.250  
7.229  
7.193  
7.134  
7.077  
6.793  
6.766

3.301  
2.495  
2.490  
2.484

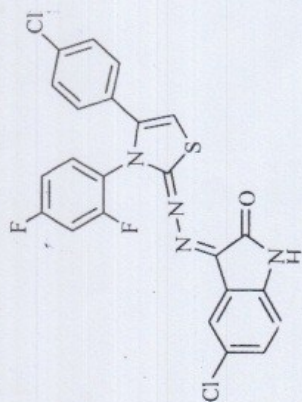

7j

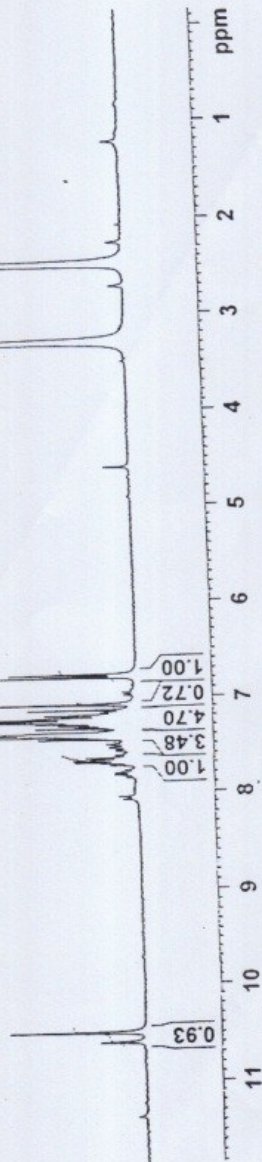

AVANCE AV-300  
LAB NO: 108

NAME  
EXPNO 2  
PROCNO 1  
Date\_ 20130712  
Time\_ 11.42  
INSTRUM spect  
PROBHD 5 mm DUL 13C-1  
PULPROG zg30  
TD 32768  
SOLVENT DMSO  
NS 55  
DS 0  
SWH 5995.204 Hz  
FIDRES 0.182959 Hz  
AQ 2.7329011 sec  
RG 812.7  
DW 83.400 usec  
DE 6.50 usec  
TE 301.5 K  
D1 1.50000000 sec  
TDO 1  
===== CHANNEL f1 =====  
NUC1 1H  
P1 12.30 usec  
PL1 4.00 dB  
SFO1 300.1321009 MHz  
SI 32768  
SF 300.1300044 MHz  
WDW EM  
SSB 0  
LB 0.30 Hz  
GB 0  
PC 1.00



File: MA#4  
Date Run: 07-04-2013 (Time Run: 09:55:14)  
Sample: MAQBOOL AHMED /DR HUMAYUN PERVEZ /INS OF CHEMICAL SC/BZU MULTAN  
Instrument: JEOL.JMS 600-H  
Inlet: My Inlet  
Ionization mode: EI+

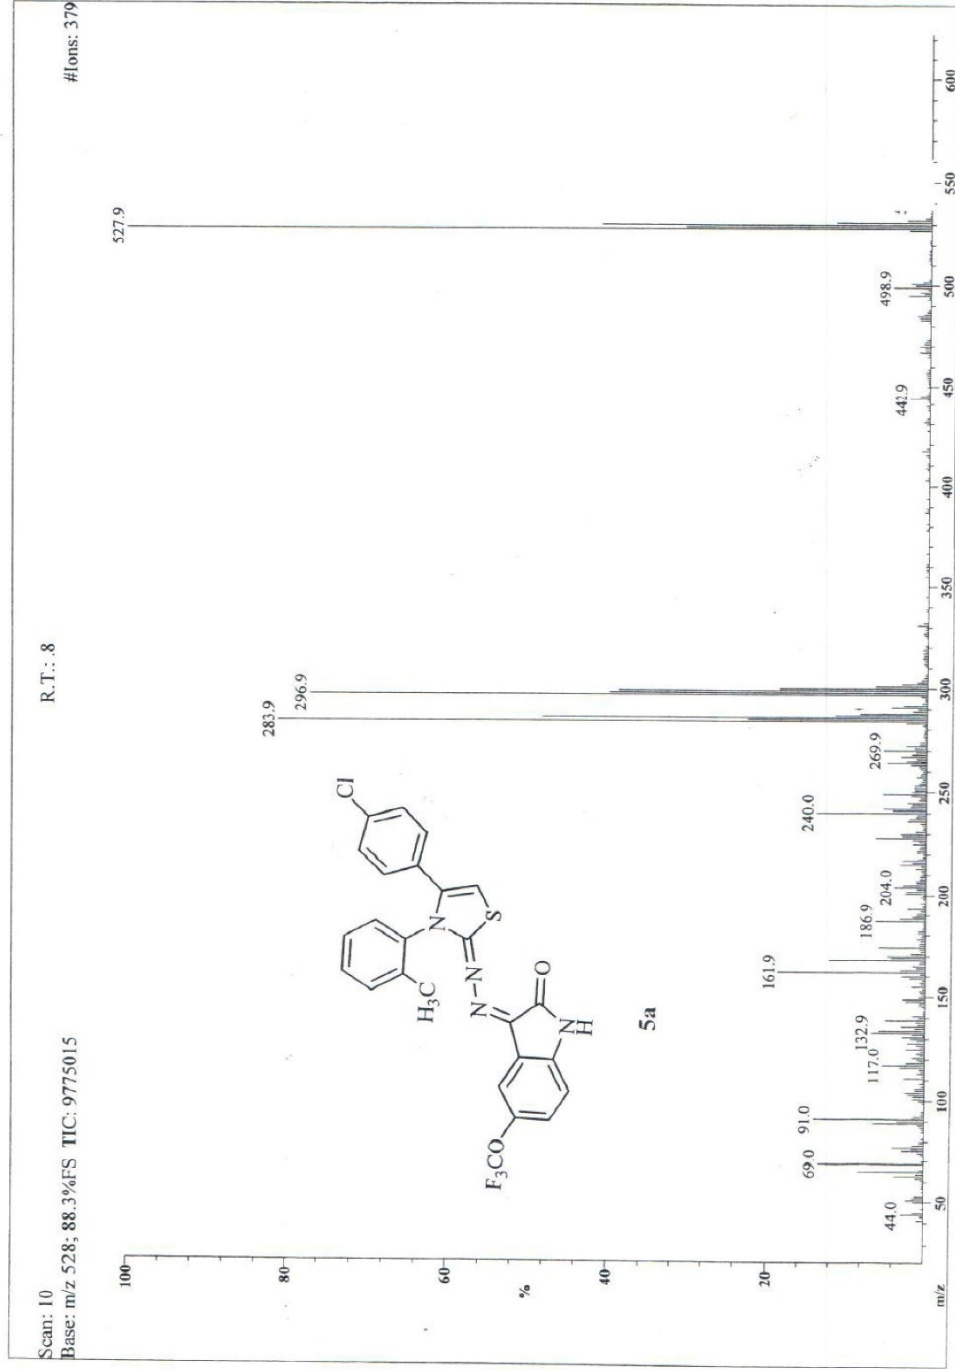

File: MA#1  
Date Run: 07-04-2013 (Time Run: 09:39:34)  
Sample: MAQBOOL AHMED /DR HUMAYUN PERVEZ/INS OF CHEMICAL SC/BZU MULTAN  
Instrument: JEOL JMS 600-H  
Inlet: My Inlet  
Ionization mode: EI+

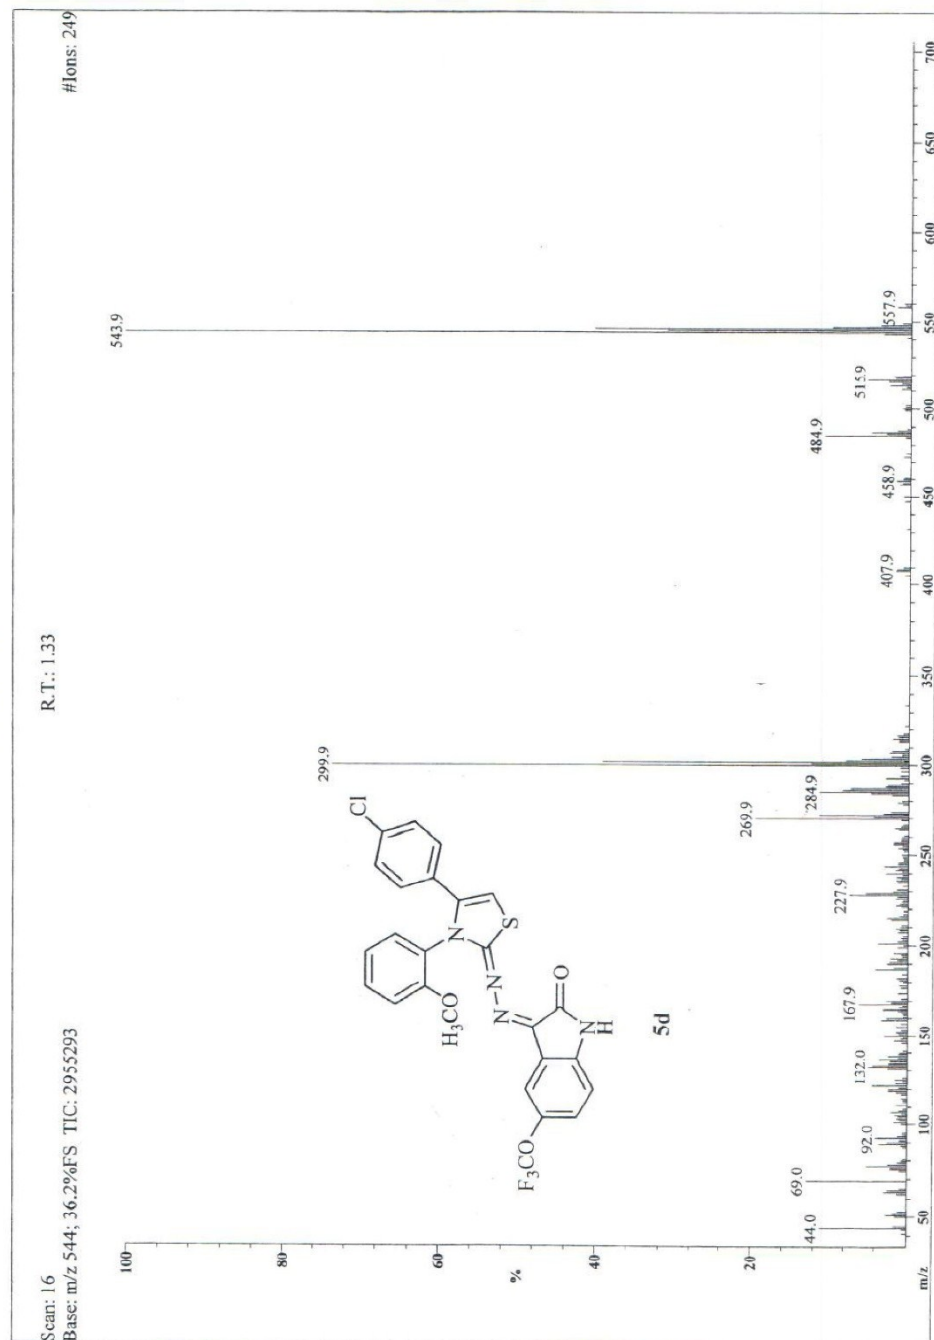

File: MA#7  
Date Run: 07-04-2013 (Time Run: 10:13:19)  
Sample: MAQBOOL AHMED /DR HUMAYUN PERVEZ /INS OF CHEMICAL SC/BZU MULTAN  
Instrument: JEOL JMS 600-H  
Inlet: My Inlet  
Ionization mode: EI+

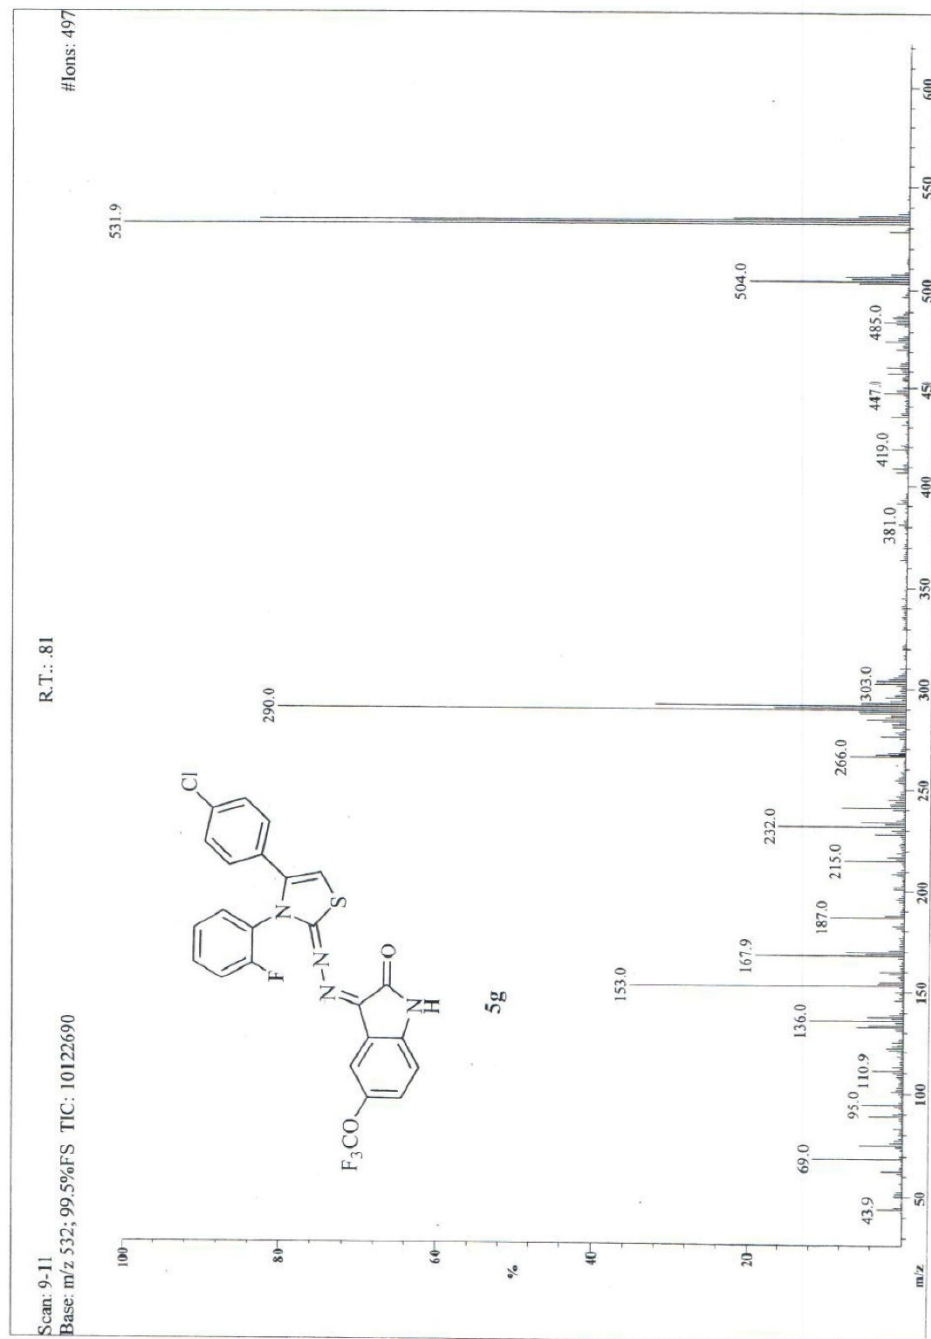



File: MA#10  
Date Run: 07-04-2013 (Time Run: 10:27:34)  
Sample: MAQBOOL AHMED /DR HUMAYUN PERVEZ /INS OF CHEMICAL SC/BZU MULTAN  
Instrument: JEOL JMS 600-H  
Inlet: My Inlet  
Ionization mode: EI+

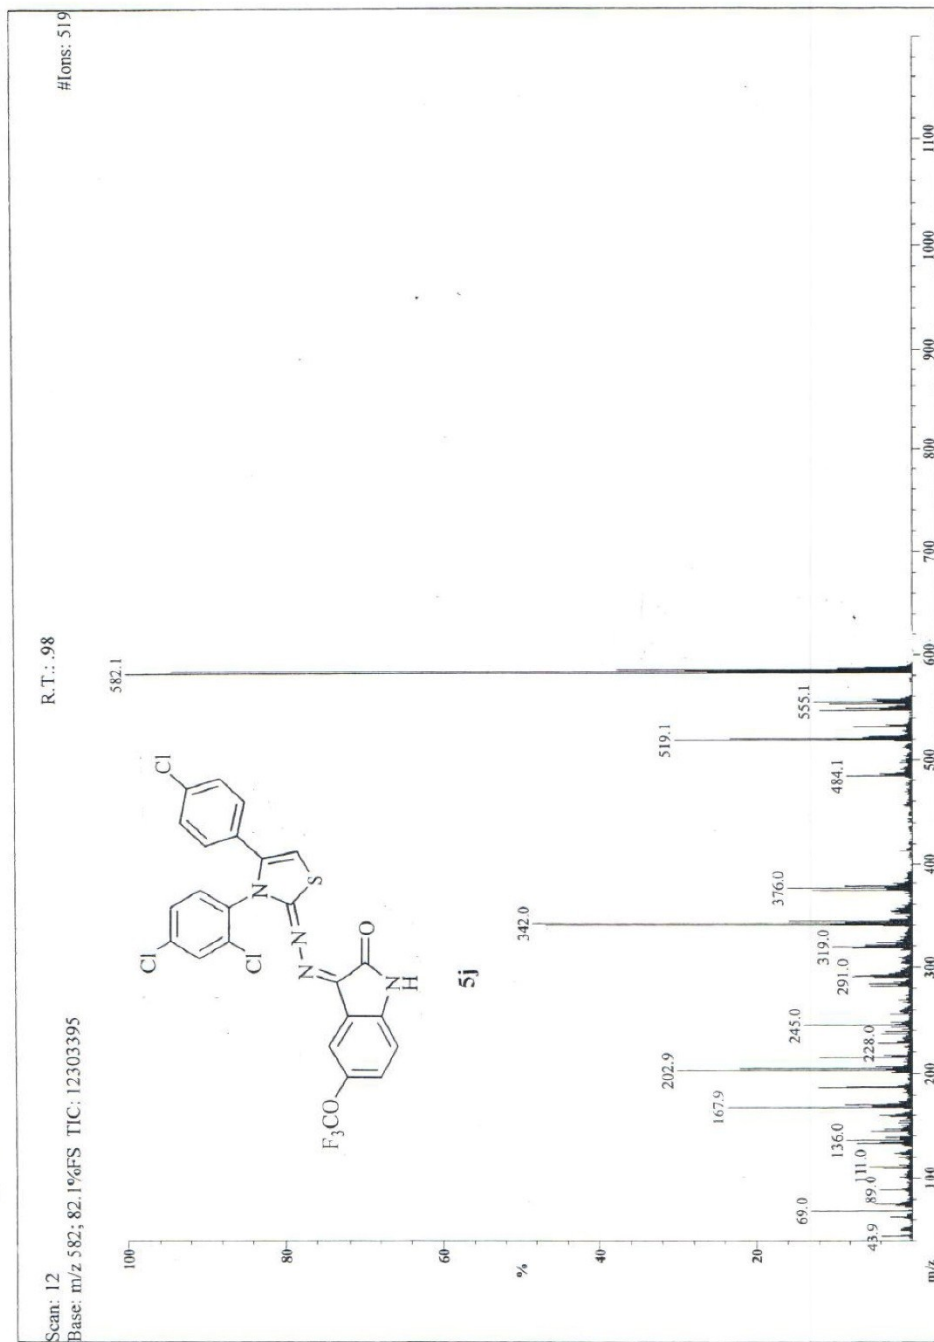

File: MA#15  
Date Run: 07-04-2013 (Time Run: 10:54:17)  
Sample: MAQBOOL AHMED /DR HUMAYUN PERVEZ/INS OF CHEMICAL SC/BZU MULTAN  
Instrument: JEOL JMS 600-H  
Inlet: My Inlet  
Ionization mode: EI+

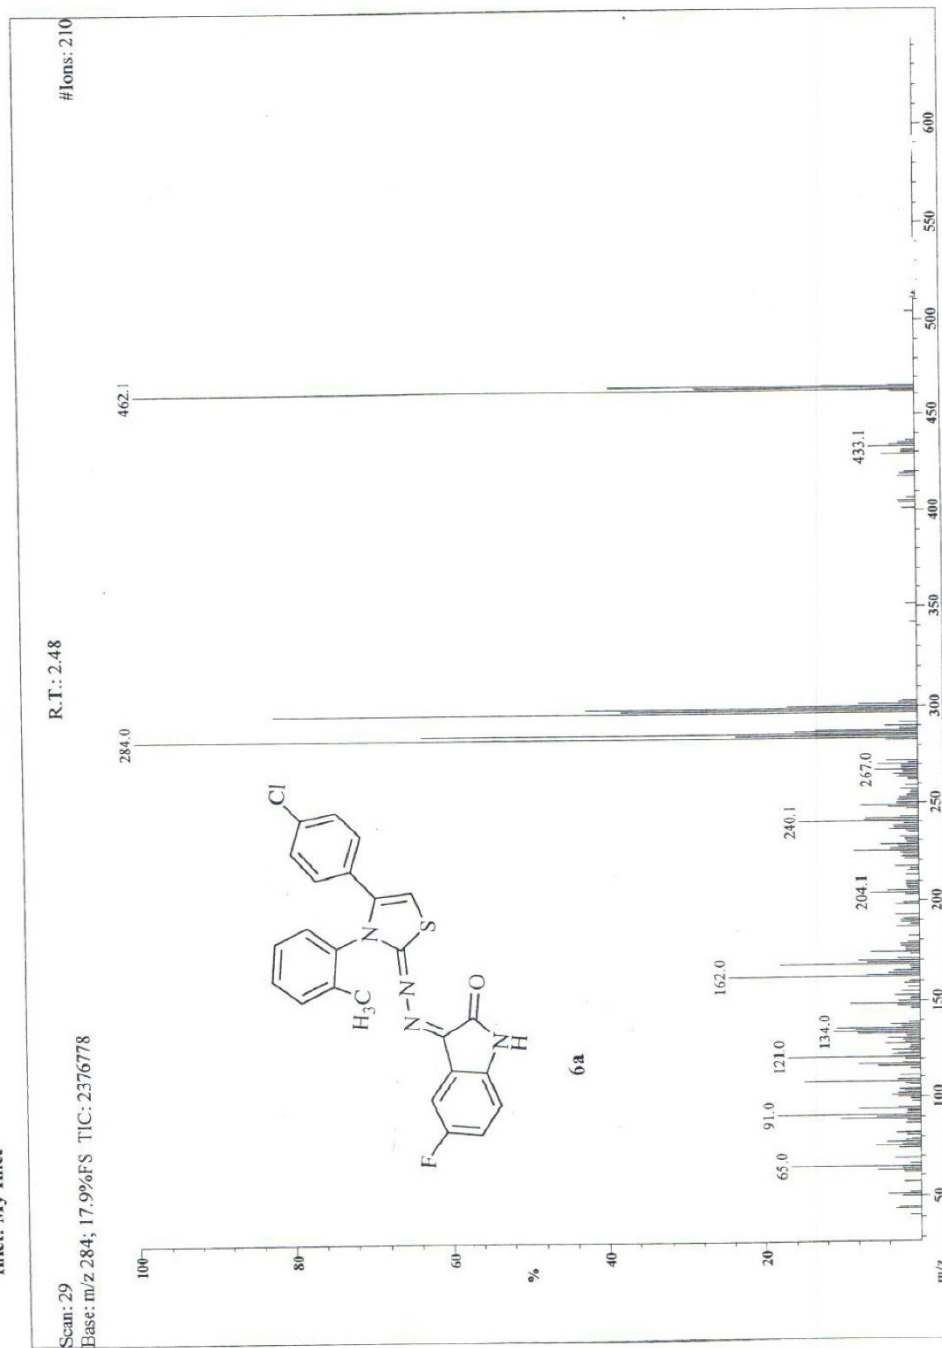

File: MA#18-  
Sample: MAQBOOL AHMED /DR HUMAYUN PERVEZ/INS OF CHEMICAL SC/BZU MULTAN  
Instrument: JEOL JMS 600-H  
Inlet: My Inlet  
Date Run: 07-04-2013 (Time Run: 11:22:21)  
Ionization mode: EI+

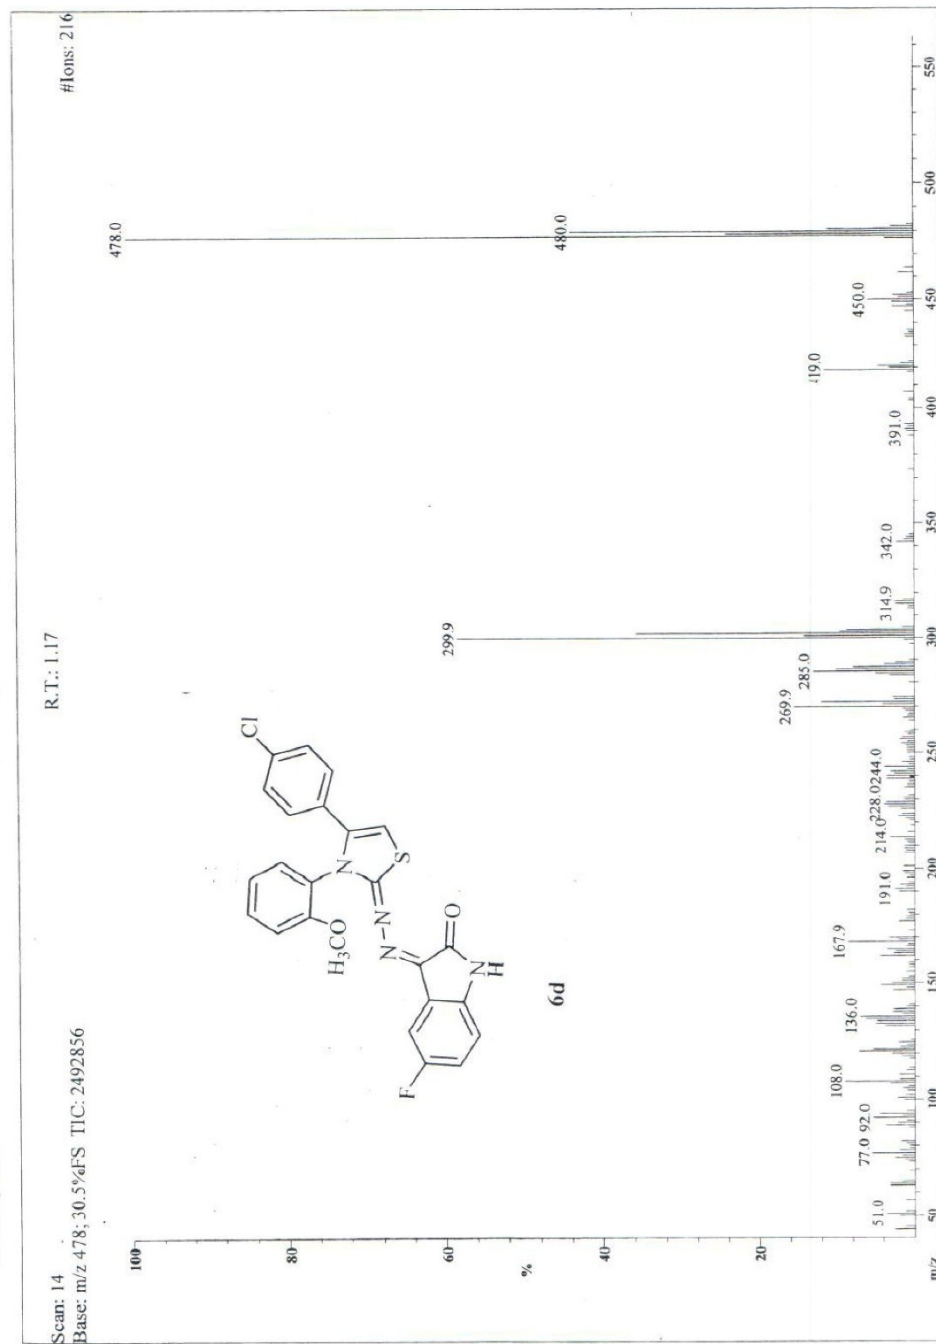



File: MA#21  
Date Run: 07-04-2013 (Time Run: 11:31:07)  
Sample: MAQBOOL AHMED /DR HUMAYUN PERVEZ/INS OF CHEMICAL SC/BZU MULTAN  
Instrument: JEOL JMS 600-H  
Inlet: My Inlet  
Ionization mode: EI+

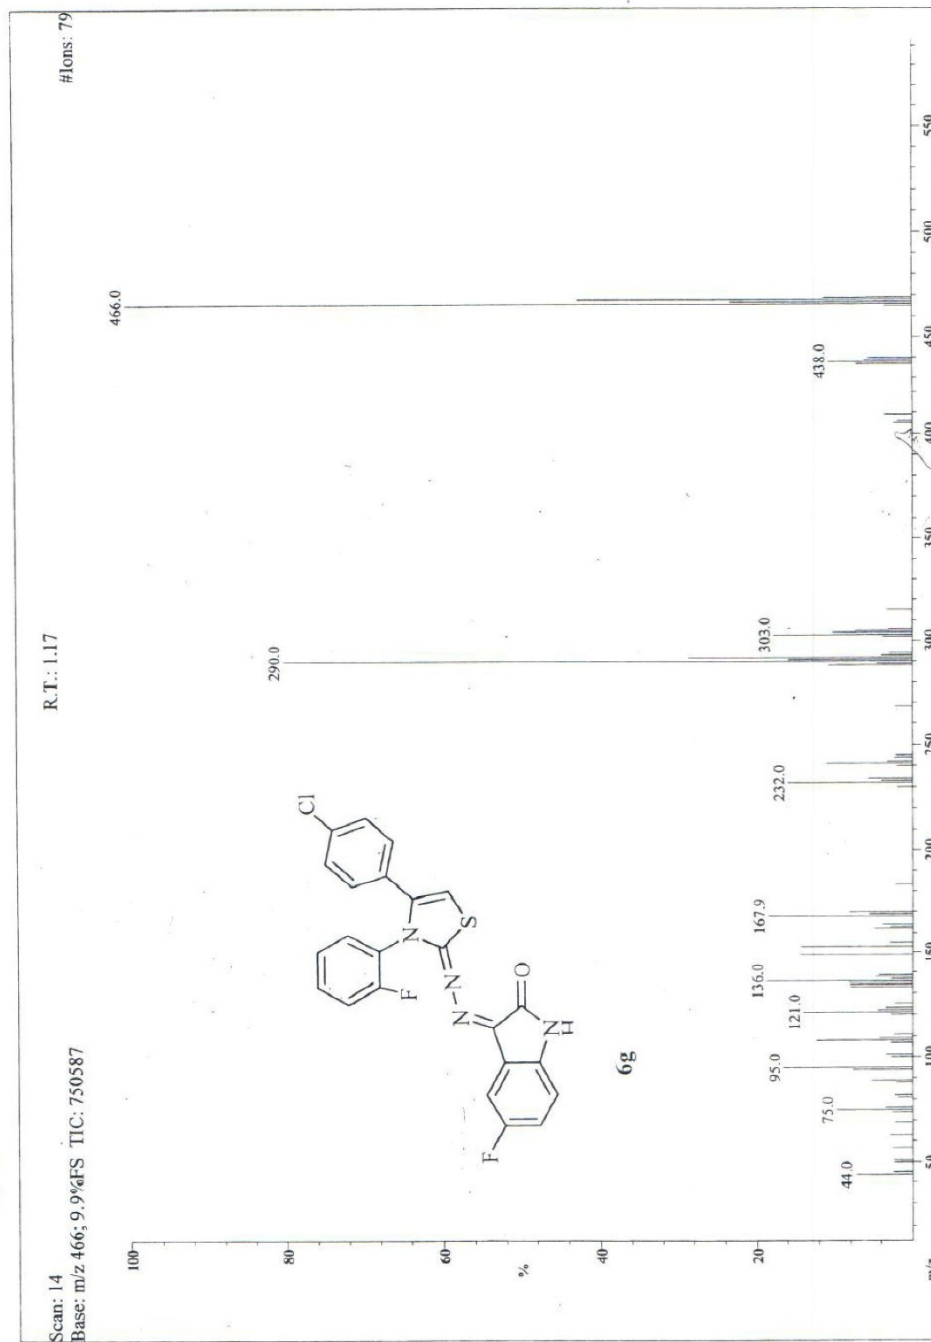

File Name : d:\mswin\data\ma-26.mss  
Creation Date/Time : 04.07.13 at 11:04:35  
File Type : Lo-Res Mass Data (Centroid)  
File Source : Acquired on MASPEC system [msw/A091]  
File Title : MAQBOOL AHMAD/DR. HUMAYUN PERVEZ/INST. OF CHEMICAL SCI. BZU.  
Operator : Barkat Ali  
Instrument : MAT312

SCAN GRAPH: Flagging=M/z.

%age Scan 14-7 04 Entries=136 100% Int.=4211.  
121.1 168.0

517.9

341.9

135.9

75.0

204.8

318.9

452.9

257.9

418.0

480.8

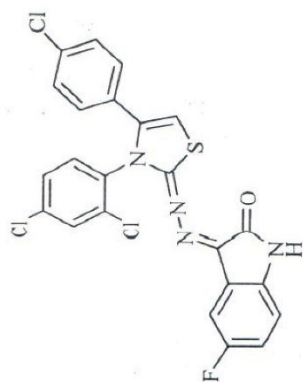

61

File Name : d:\mswin\data\me-31.mss  
Creation Date/Time : 04.06.13 at 14:19:07  
File Type : Lo-Res Mass Data (Centroid)  
File Source : Acquired on MASPEC system [mswA091]  
File Title : MAQBICOL AHMAD/DR. HUMAYUN PERVEZ/INST. OF CHEMICAL SCI. BZU.  
Operator : Barkat Ali  
Instrument : MAT312

SCAN GRAPH, Flgging=M/z.

Scan 13-6:33. Entries=223. 100% Int.=7099.

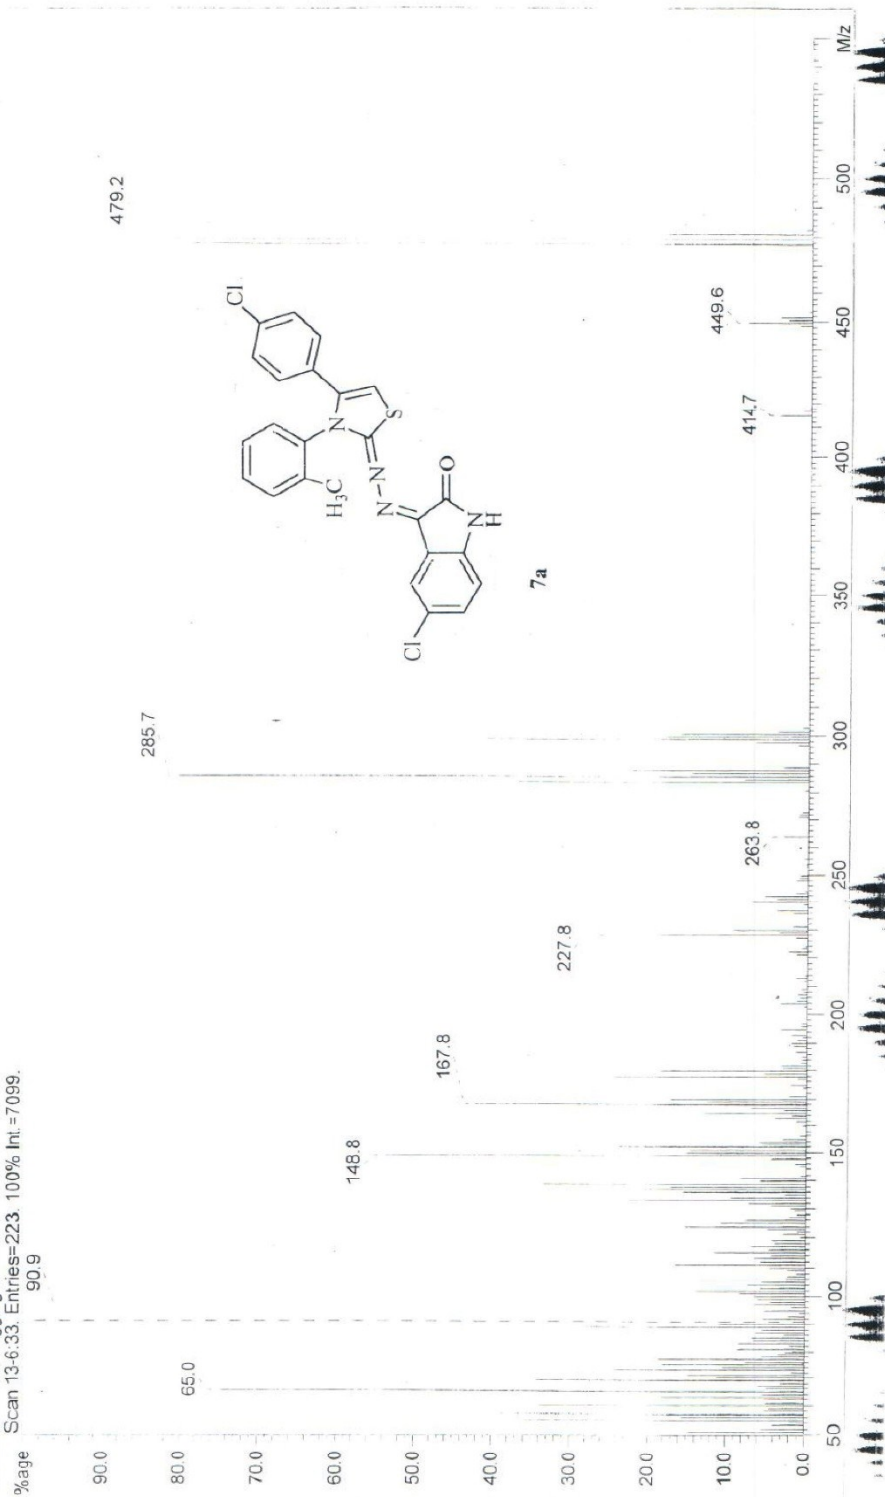



File Name : d:\mswin\data\ma-33.mss  
Creation Date/Time : 04.06.13 at 15:30:30  
File Type : Lo-Res Mass Data (Centroid)  
File Source : Acquired on MASPEC system [msw/A091]  
File Title : MAQBOOL AHMAD/DR. HUMAYUN PERVEZ/INST. OF CHEMICAL SCI. BZU.  
Operator : Barkat Ali  
Instrument : MAT312

SCAN GRAPH, Flaggings=M/z

Scan 9-4:40, Entries=220, 100% Int.=17050.

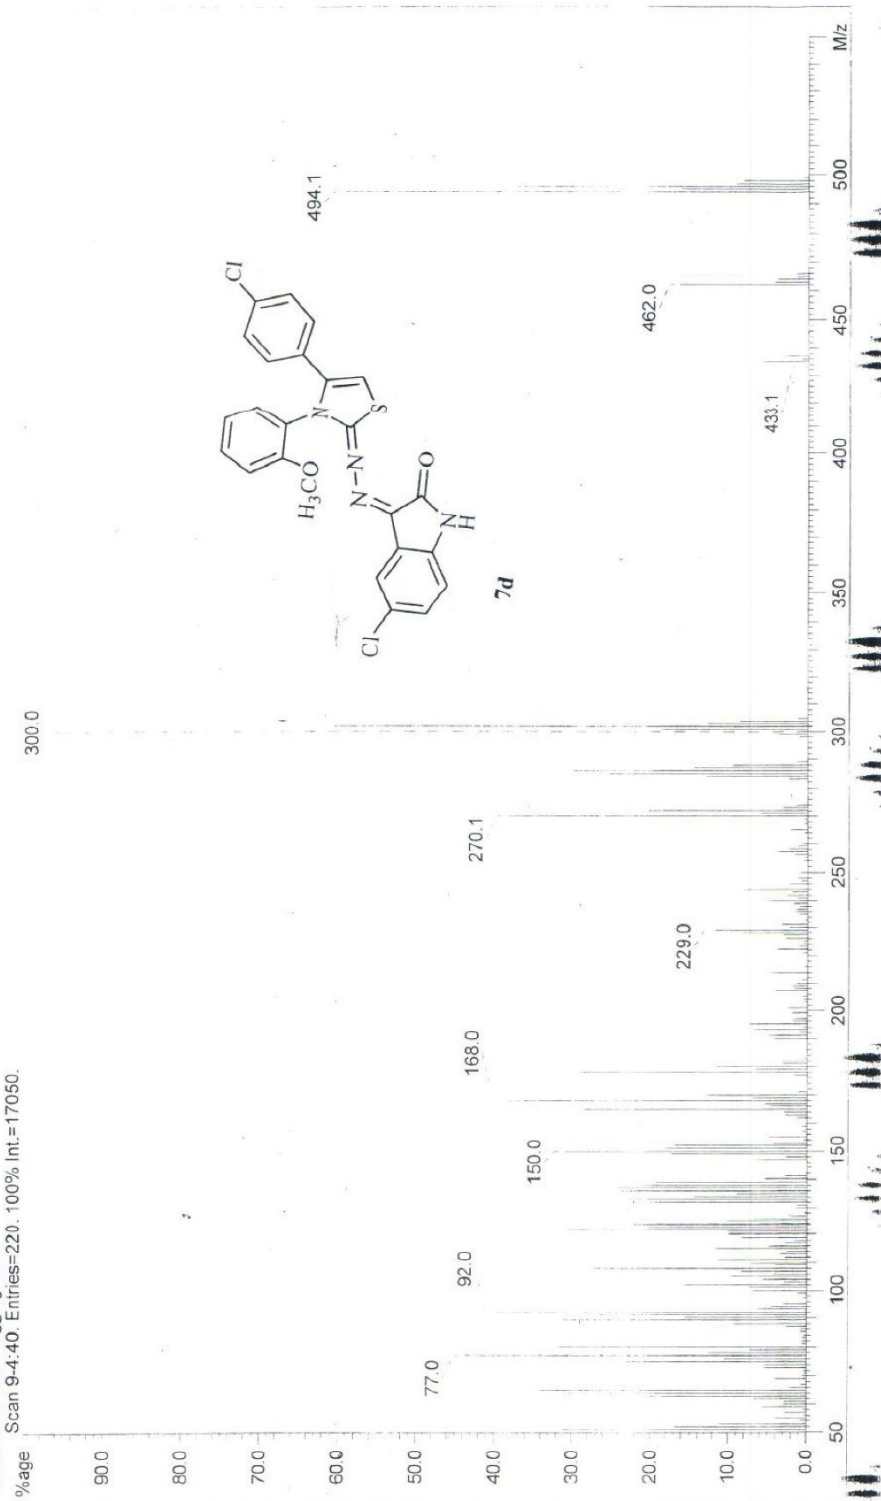

File Name : d:\mswin\data\ma-36.mss  
Creation Date/Time : 04.06.13 at 16:16:31  
File Type : Lo-Res Mass Data (Centroid)  
File Source : Acquired on MASPES system [msw/A091]  
File Title : MAQEOL AHMAD/DR. HUMAYUN PERVEZ/INST. OF CHEMICAL SCI. BZU  
Operator : Barkat Ali  
Instrument : MAT312

SCAN GRAPH, Flgging=M/z  
%age Scan 8-4.09, Entries=216, 100% Int=12124.

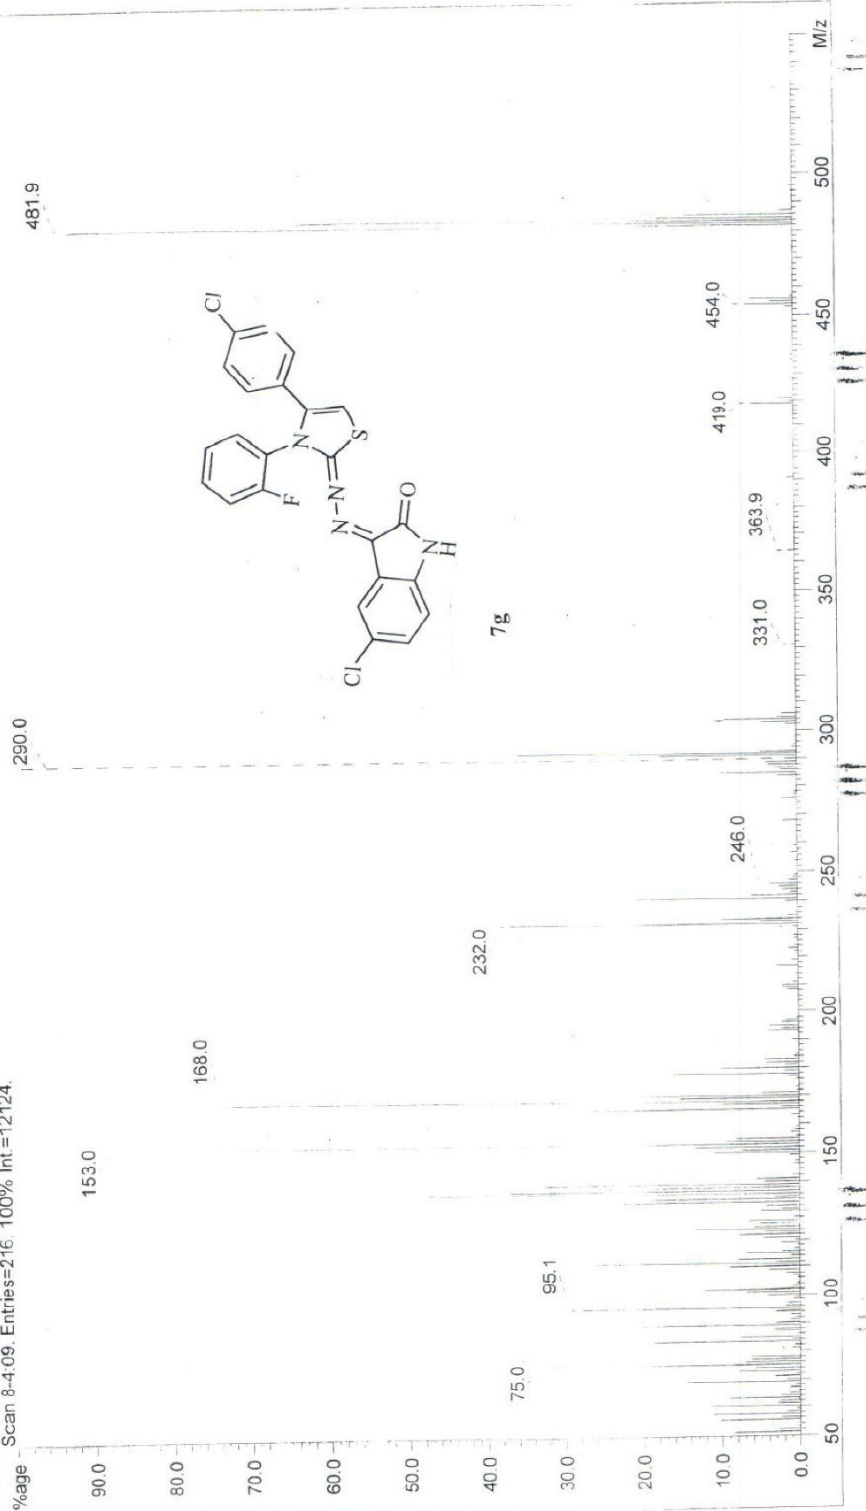

File Name : d:\mswin\data\ma-39.mss  
Creation Date/Time : 05.06.13 at 10:01:05  
File Type : Lo-Res Mass Data (Centroid)  
File Source : Acquired on MASPEC system [msw/A091]  
File Title : MAQBOOL AHMAD/DR. HUMAYUN PERVEZ/INST. OF CHEMICAL SCI. BZU.  
Operator : Barkat Ali  
Instrument : MAT312

SCAN GRAPH, Flgging=M/z.  
Scan 10-5:28. Entries=123, 100% Int=5973.  
%age

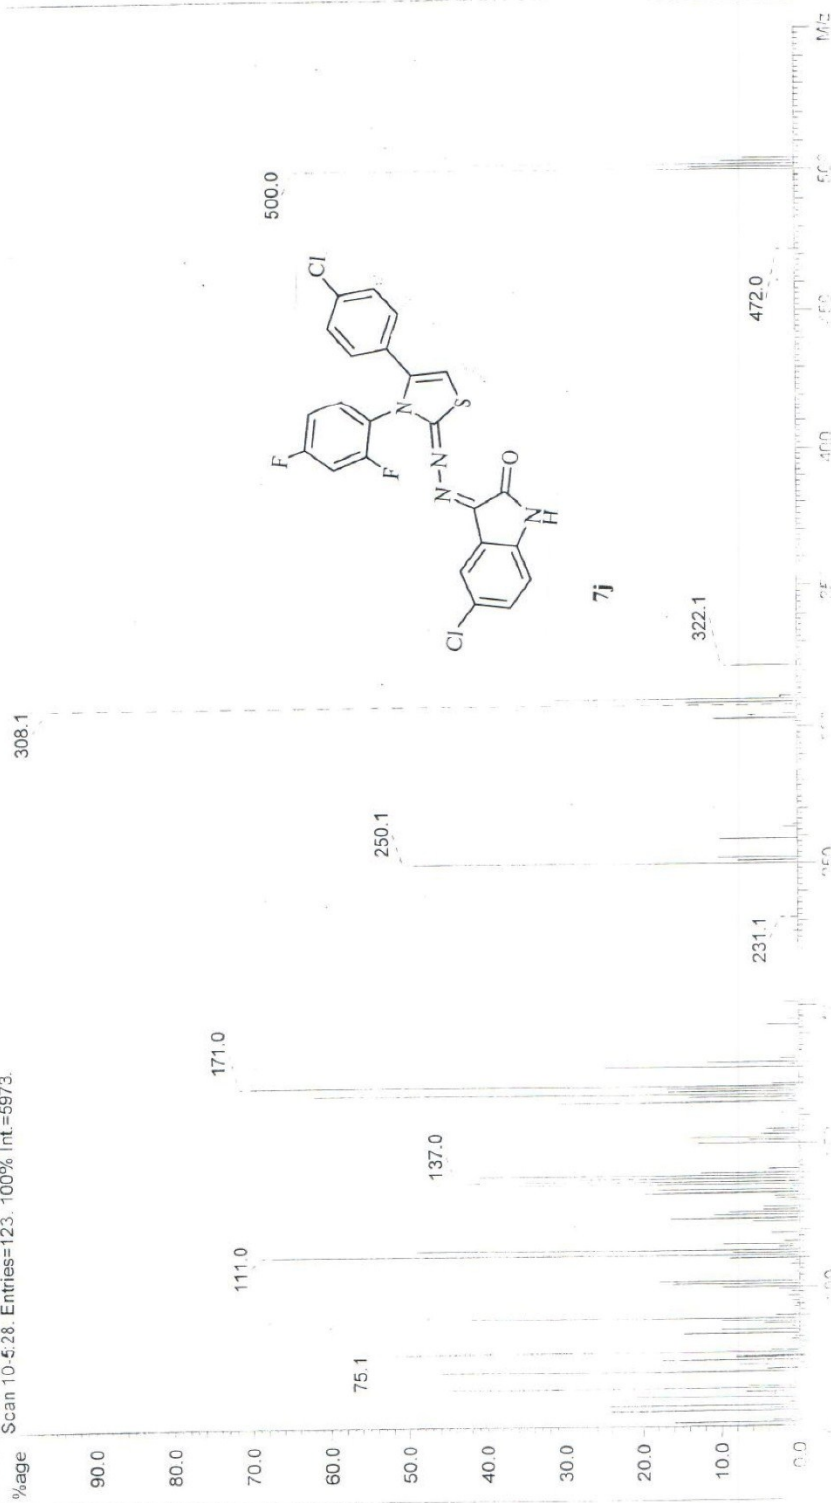

Supplement: c6ra10043k1.pdf [file c6ra10043k1.pdf]
